# Supplementary material for: Sulfatase 2 Affects Polarization of M2 Macrophages through the IL-8/JAK2/STAT3 Pathway in Bladder Cancer
Source: MDPI journal article supplement (doi:10.3390/cancers15010131), 2022-12-26

Figure 2B

GAPDH

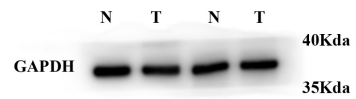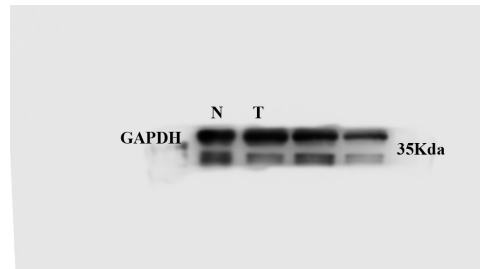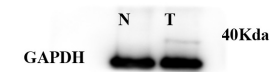

SULF2

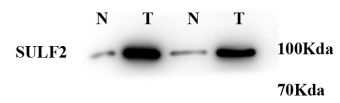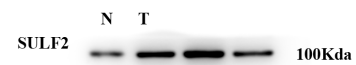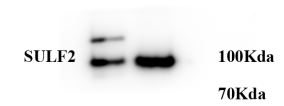

Figure2D

GAPDH

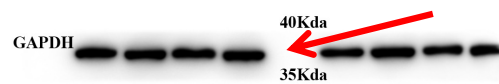

SULF2

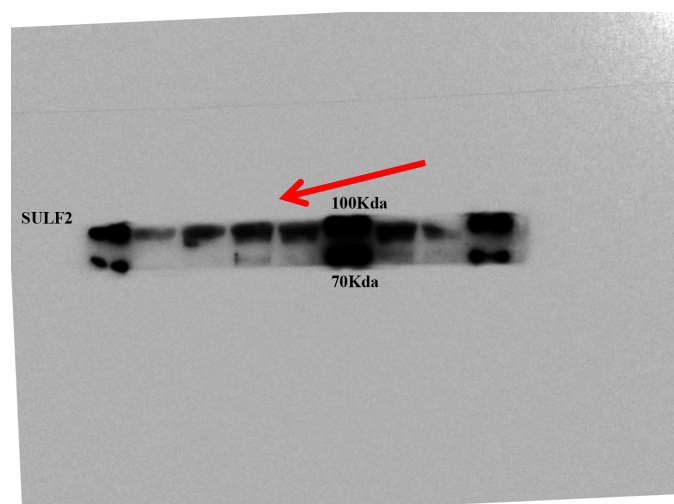

Figure 2E

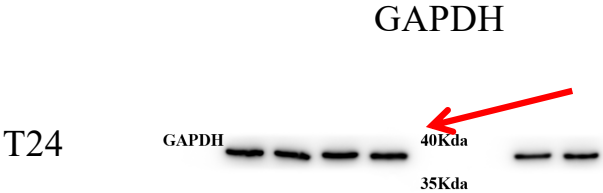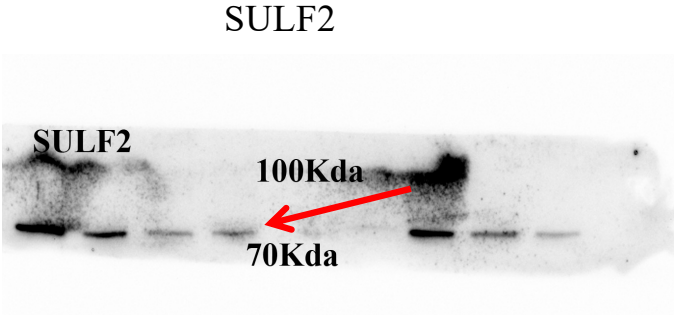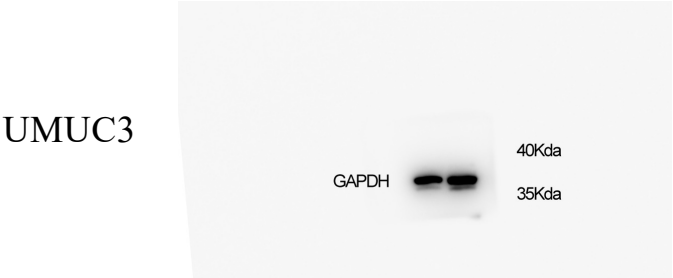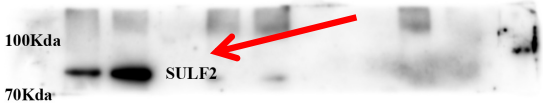

Figure4D

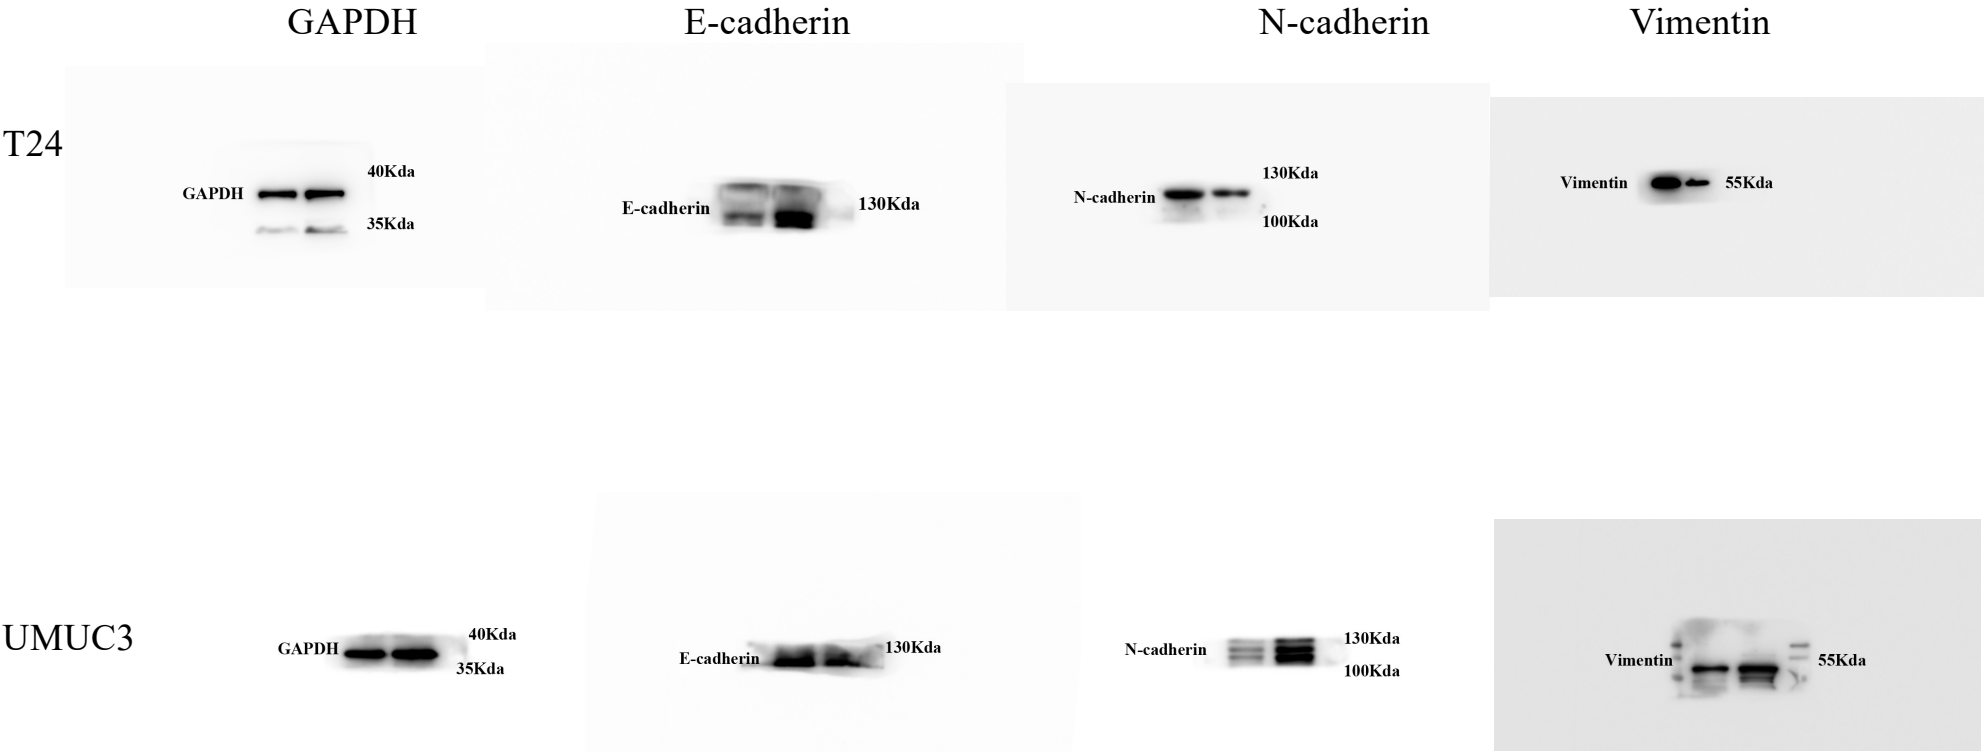

Figure6B

T24

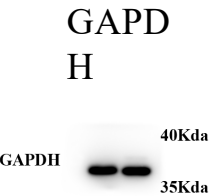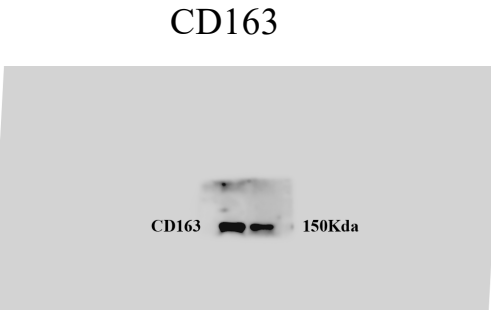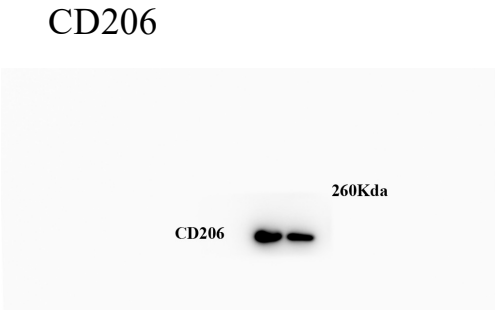

UMUC3

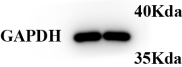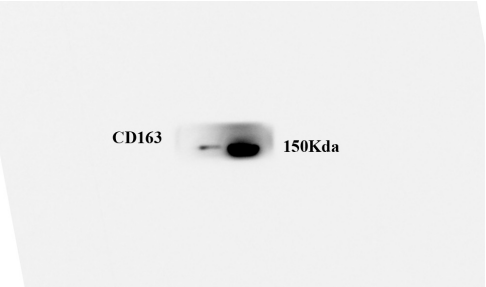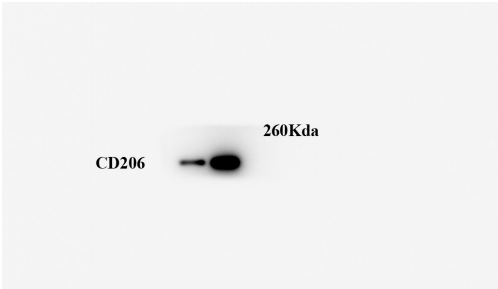

Figure6E

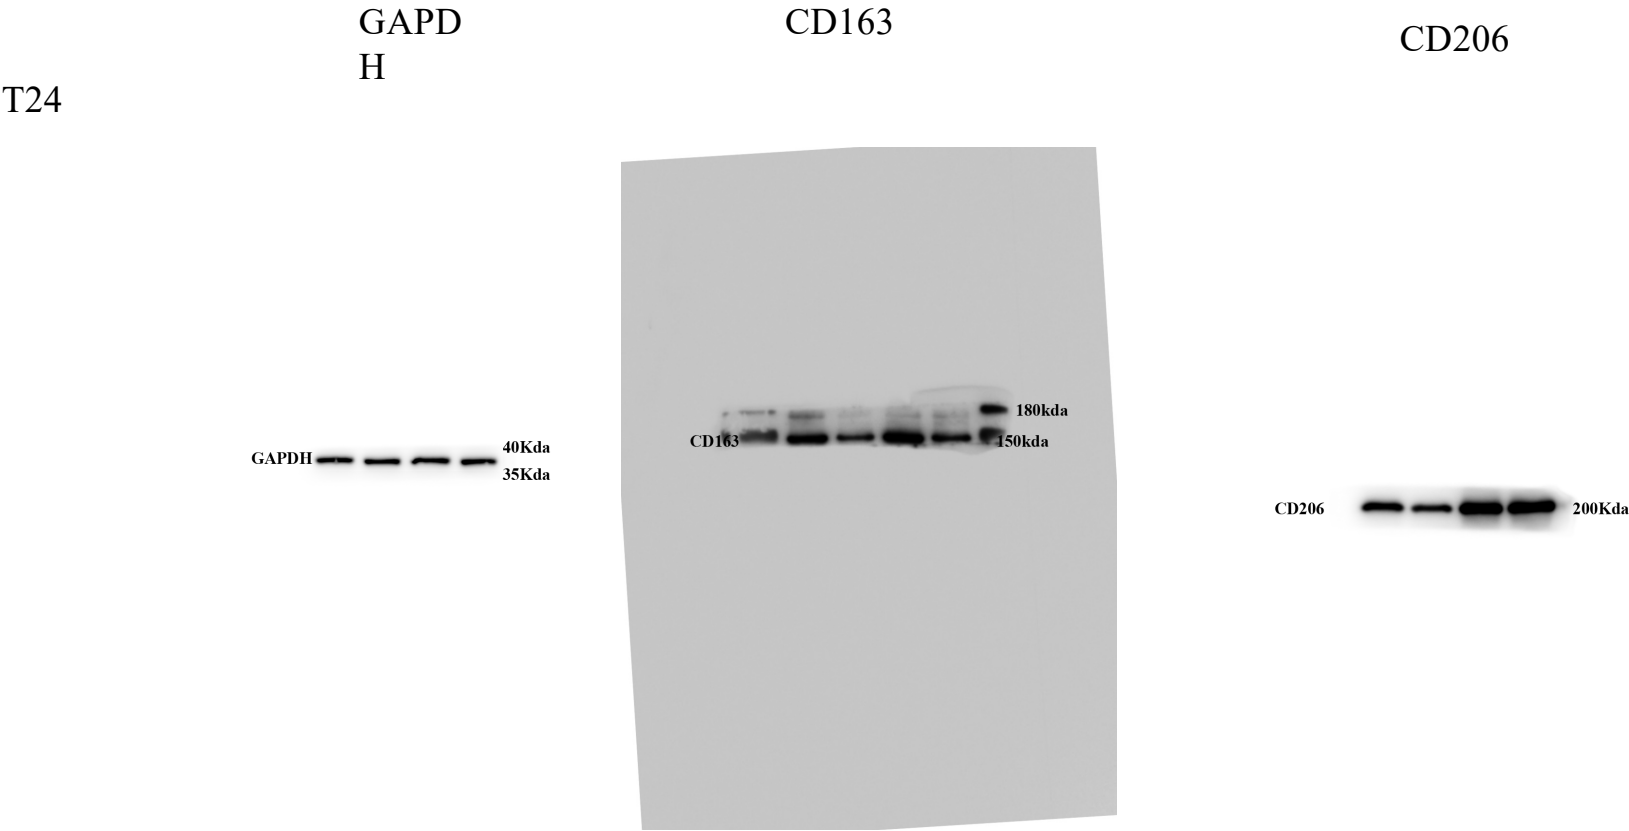

Figure6F

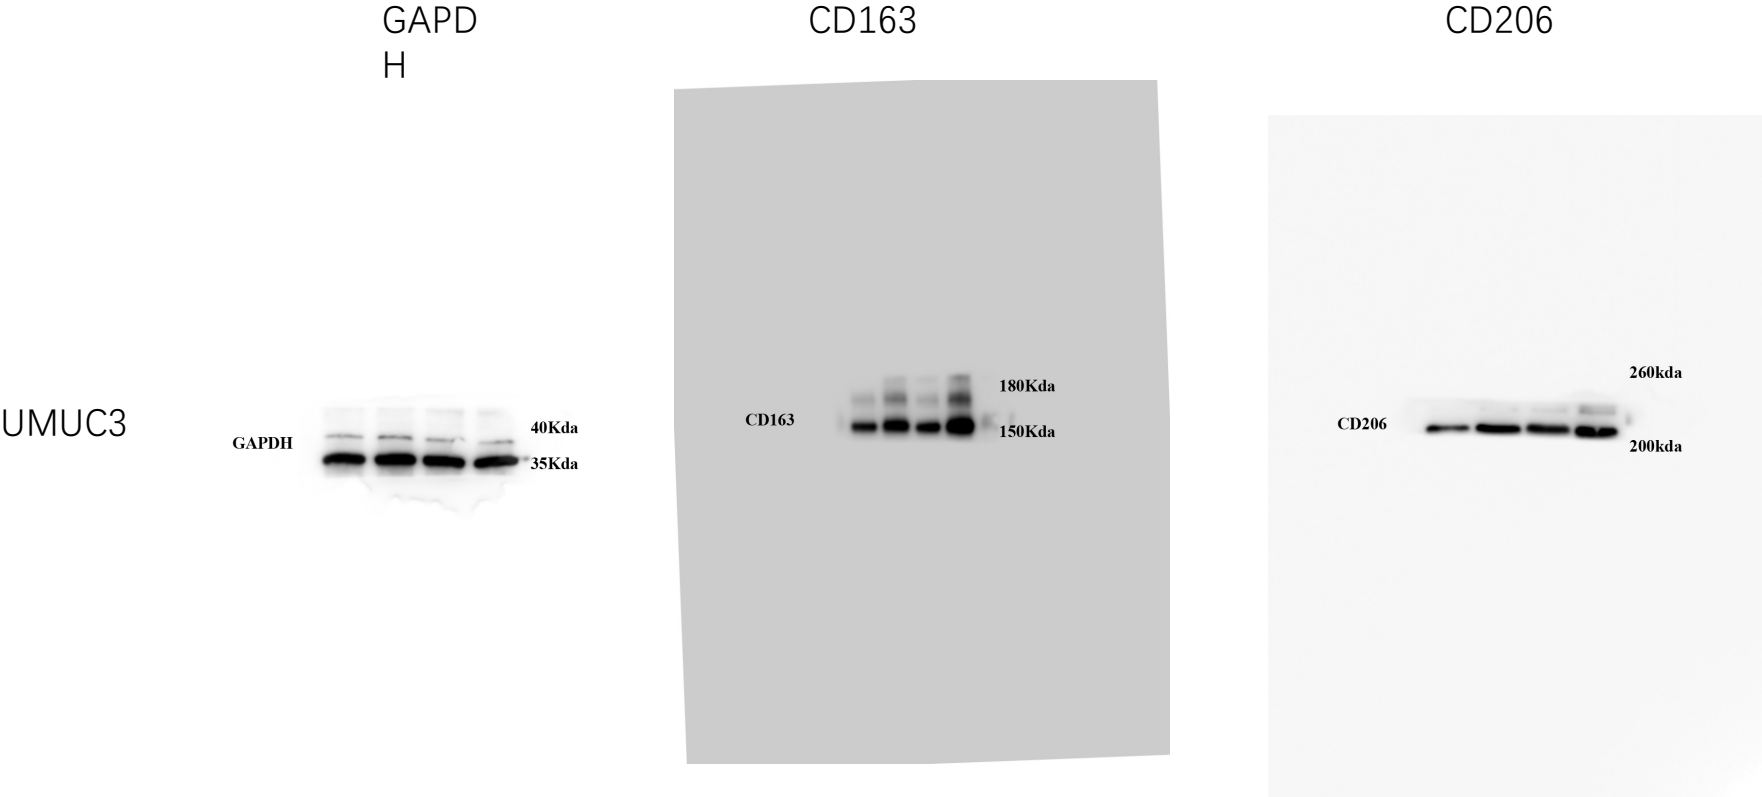

Figure6H

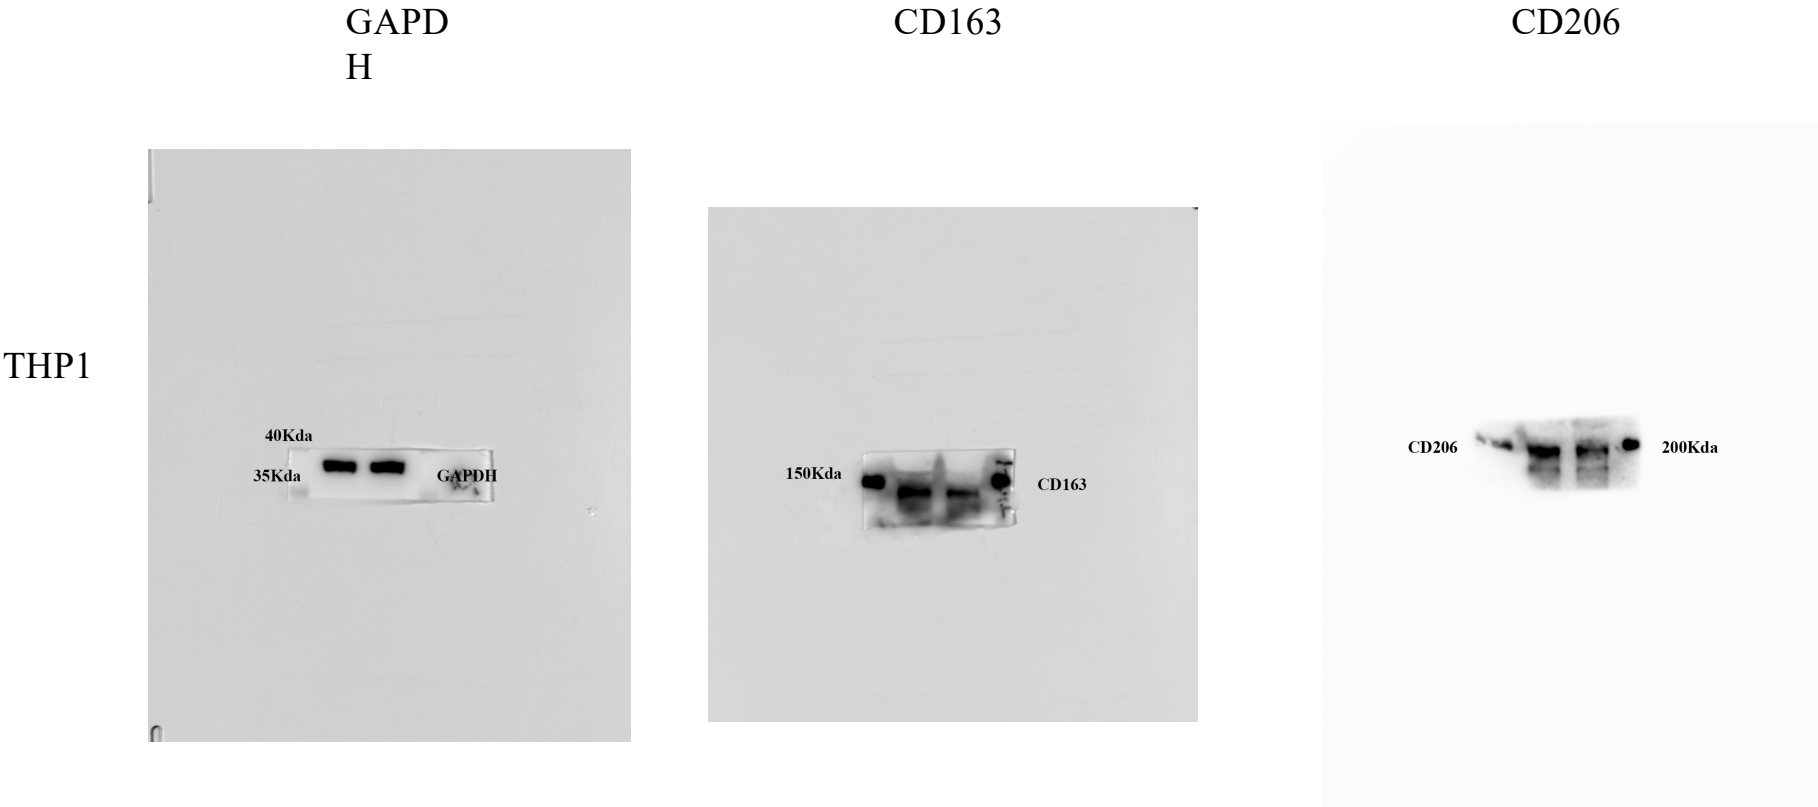



Figure7B

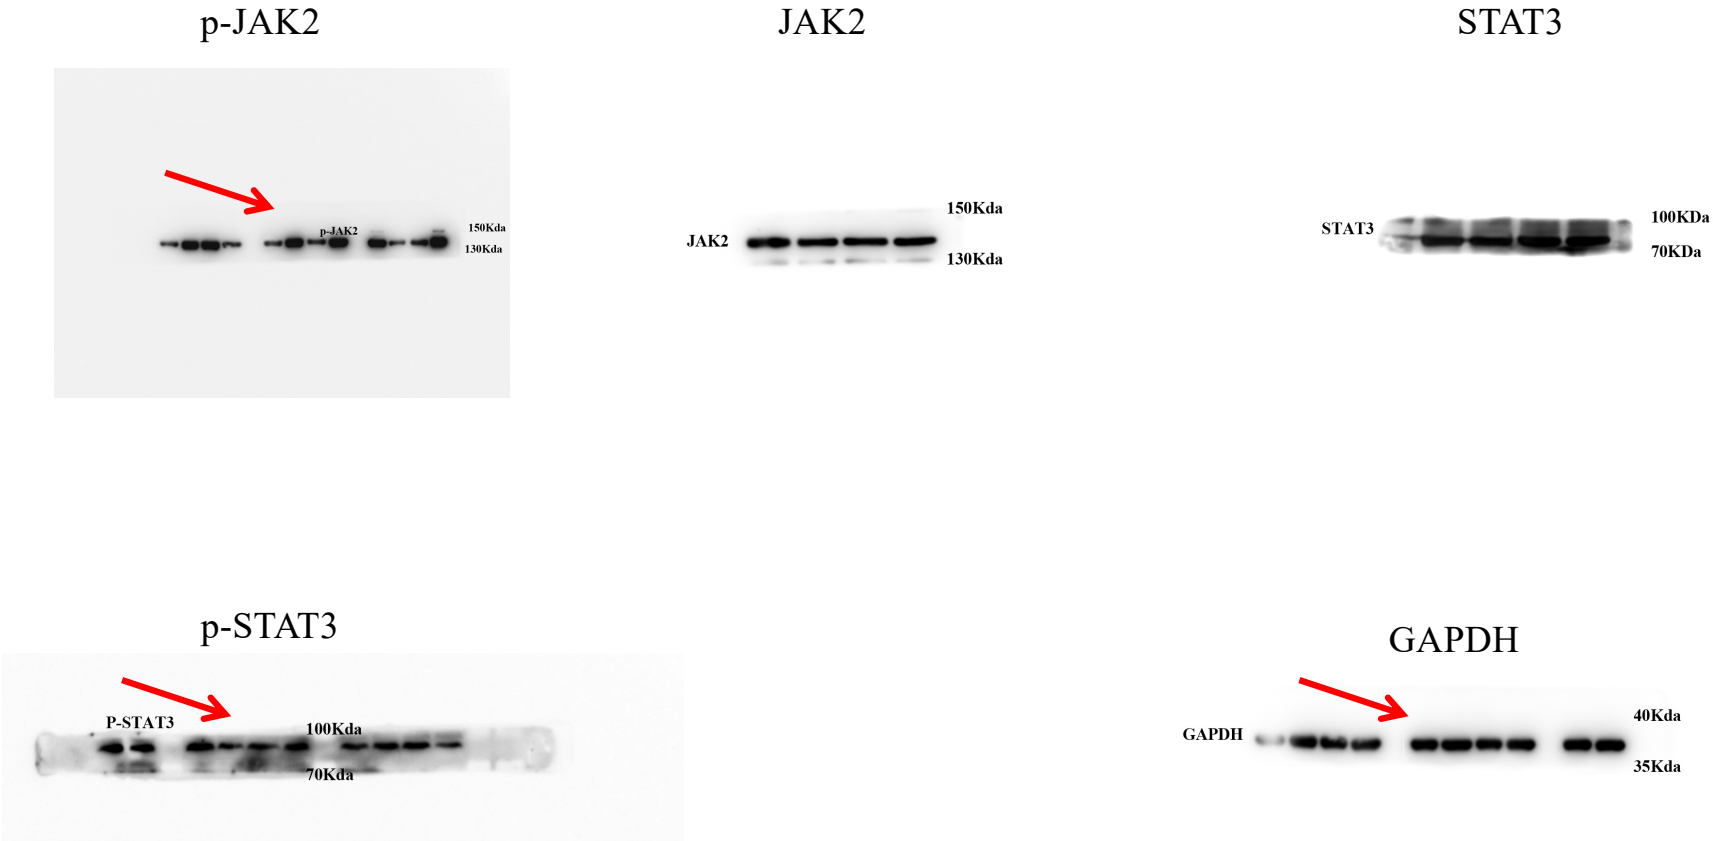

Figure7C

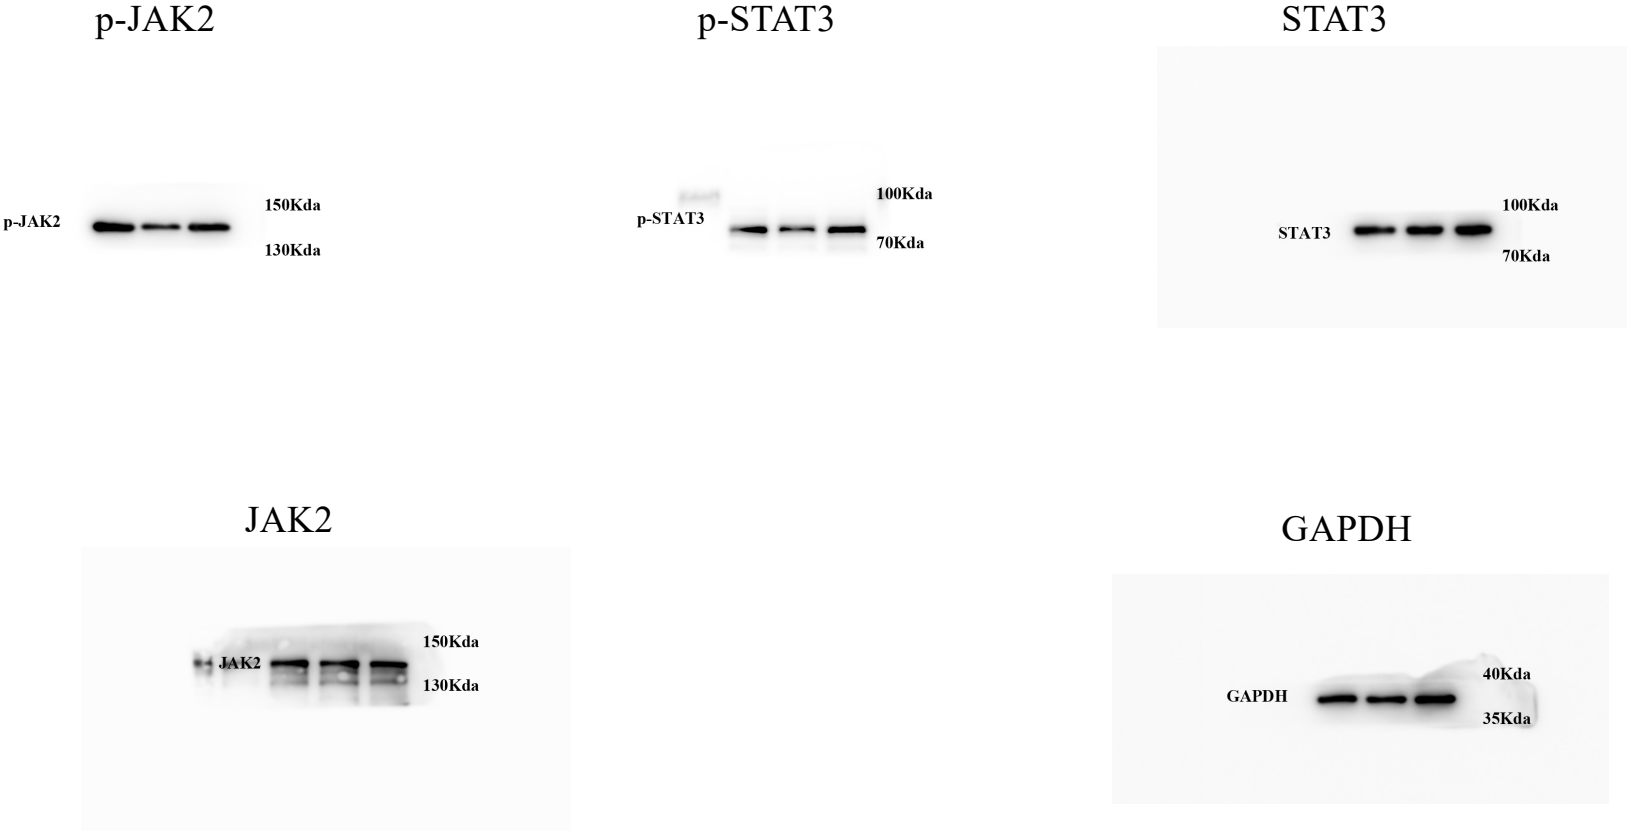

Figure7D

p-JAK2

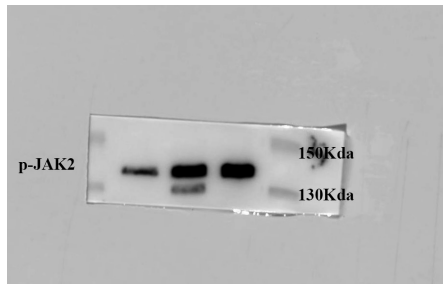

p-STAT3

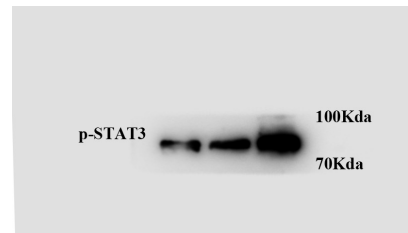

STAT3

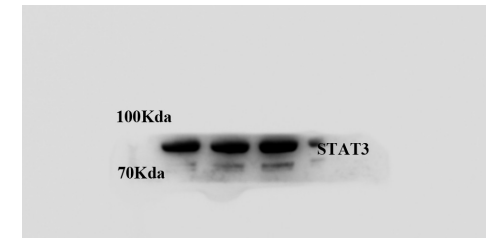

JAK2

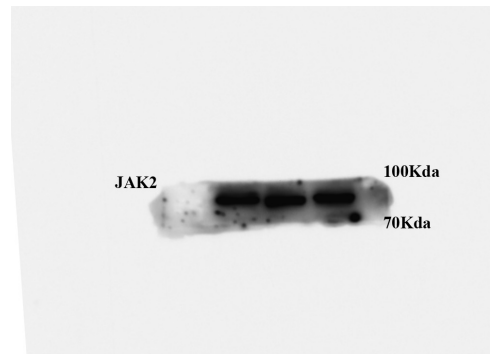

GAPDH

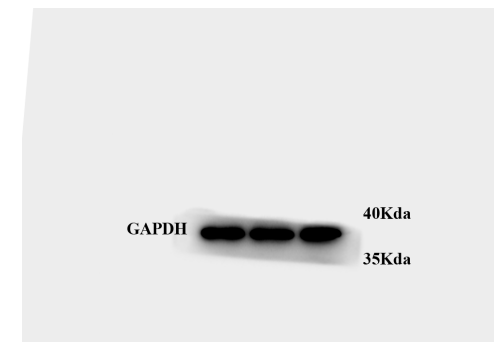

Figure6H

GAPDH

CD206

CD163

T24

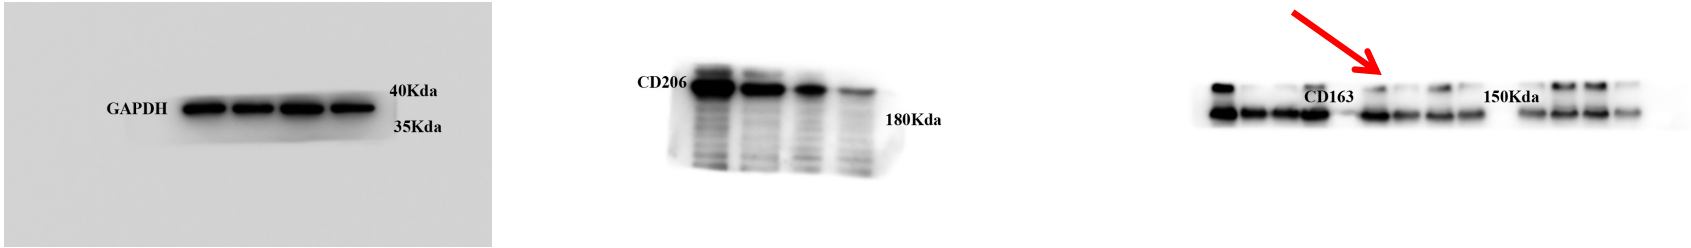

Figure6H

GAPD  
H

CD163

CD206

UMUC3

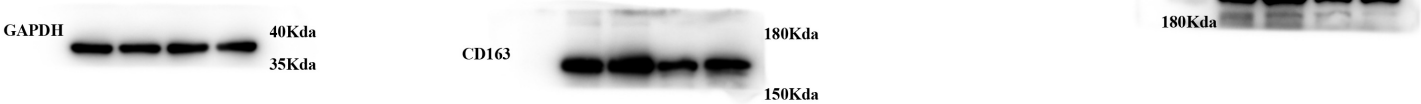

FigureS2A

GAPDH

GAPDH

40Kda  
35Kda

wnt3A

40Kda  
35Kda

Wnt 3a

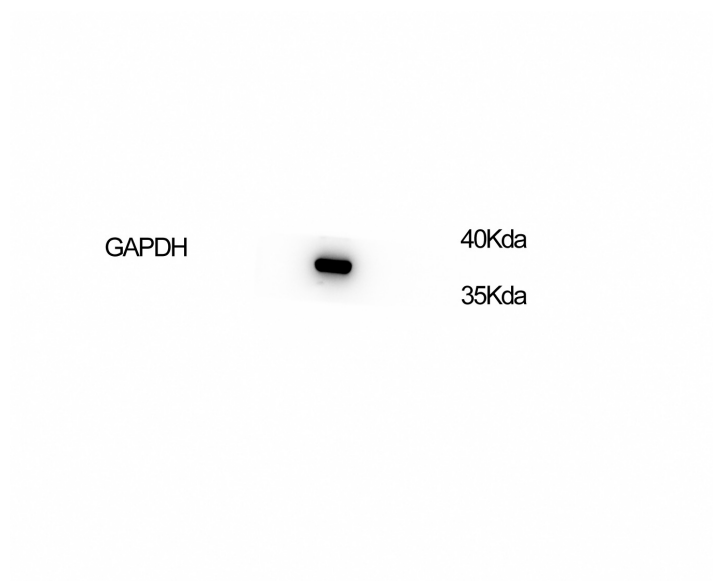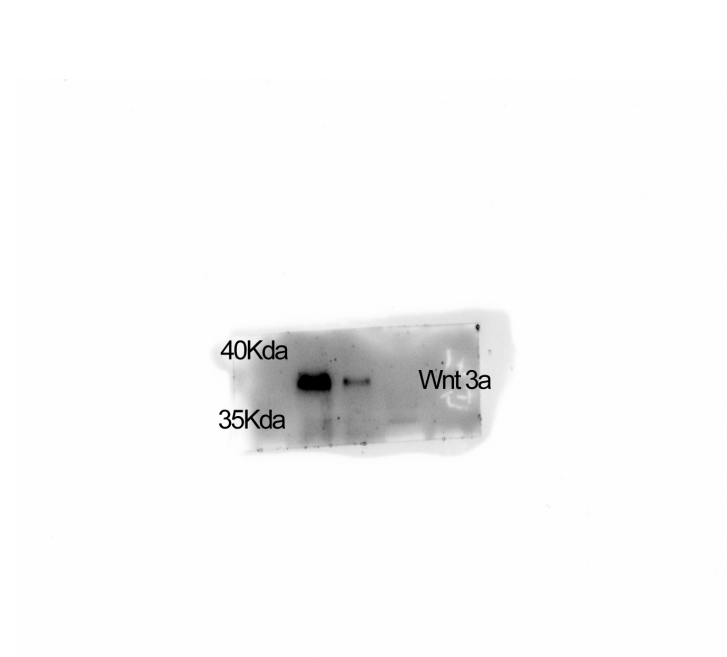

FigureS2B

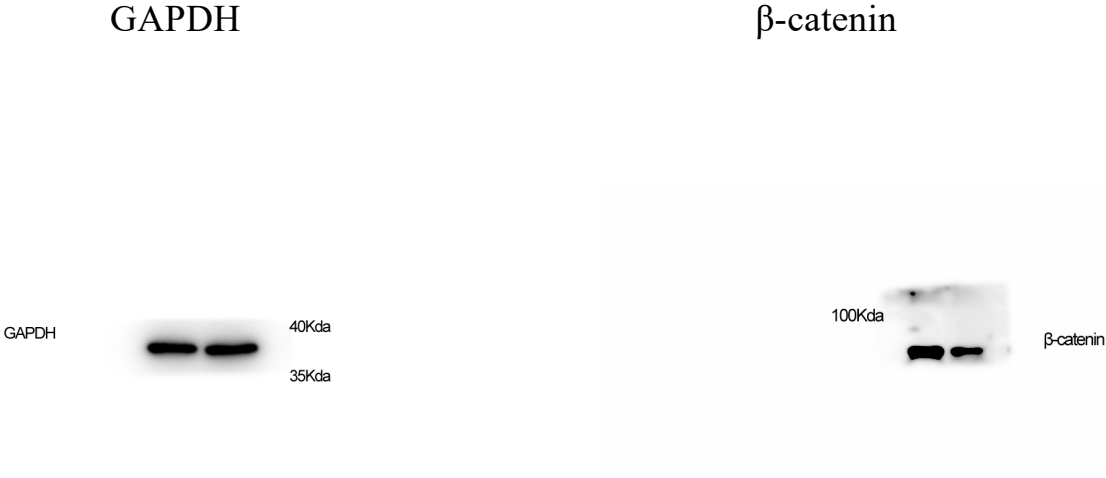

FigureS2C

GAPDH

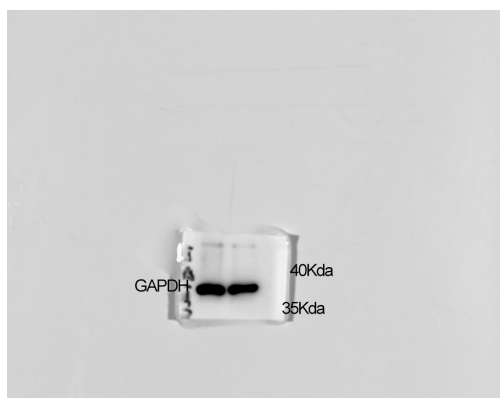

$\beta$ -catenin

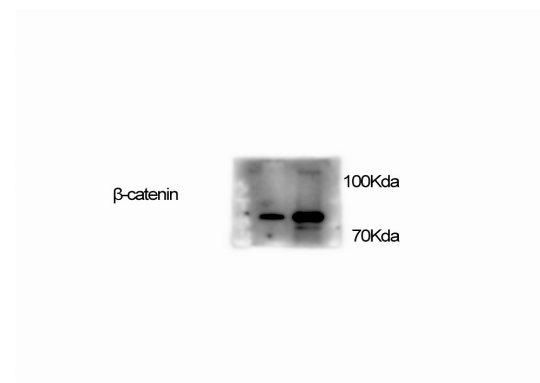



FigureS2D

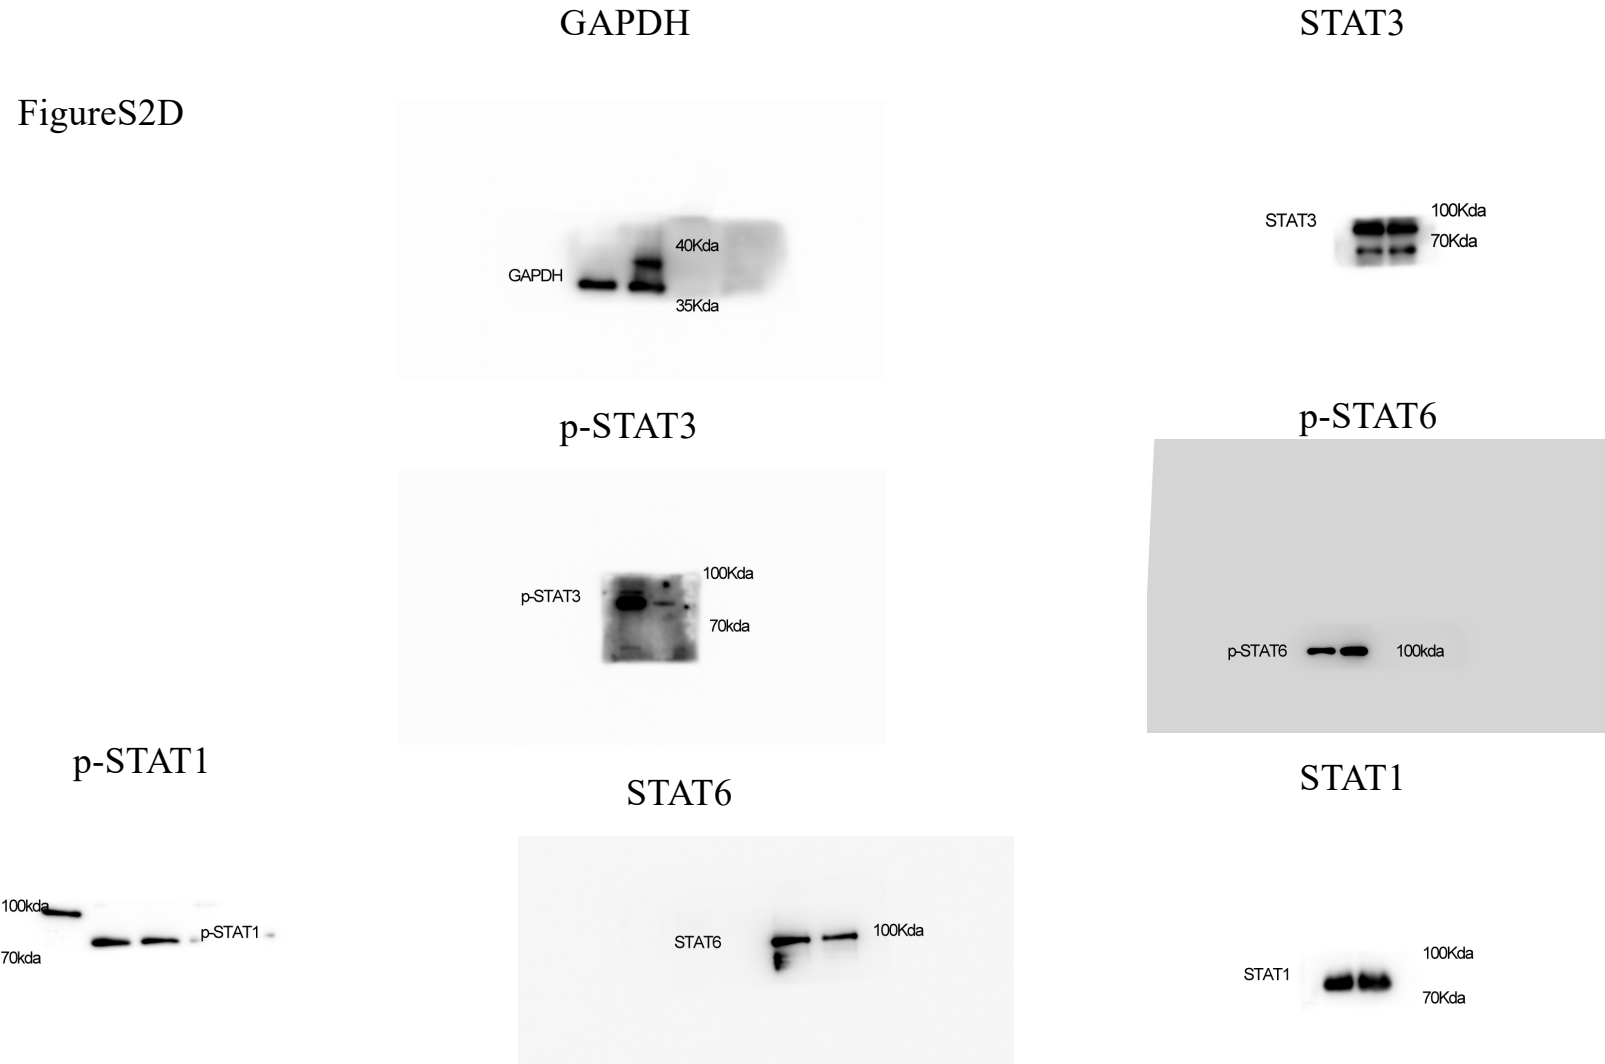

Supplement: s1 [file s1]
