# Supplementary material for: Sulfatase 2 Affects Polarization of M2 Macrophages through the IL-8/JAK2/STAT3 Pathway in Bladder Cancer
Source: MDPI journal article supplement (doi:10.3390/cancers15010131), 2022-12-26
Supplement: s1 [file s1]

Supplementary Figure S1

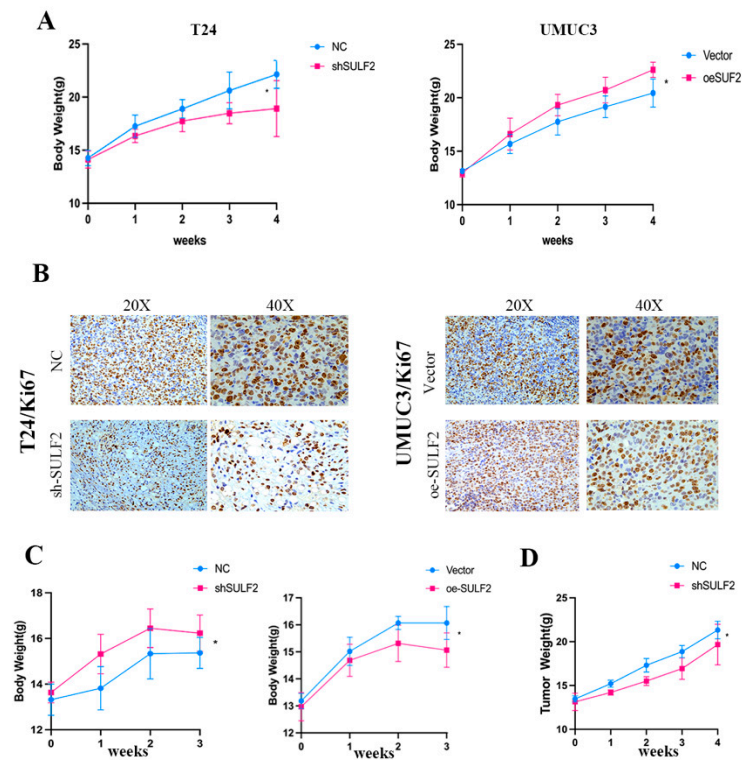

**Figure S1 IHC and Body Weight of SULF2 *in vivo*** (A) Representative images of Ki67 in tumor cell xenograft after knockdown SULF2 by IHC staining.(B-D) Analysis of tumor growth for the subcutaneous xenotransplant tumor models(b), tail vein lung metastasis model(c) and orthotopic bladder cancer model(d).
