# Supplementary material for: Sulfatase 2 Affects Polarization of M2 Macrophages through the IL-8/JAK2/STAT3 Pathway in Bladder Cancer
Source: MDPI journal article supplement (doi:10.3390/cancers15010131), 2022-12-26
Supplement: s1 [file s1]

Supplementary Figure S2

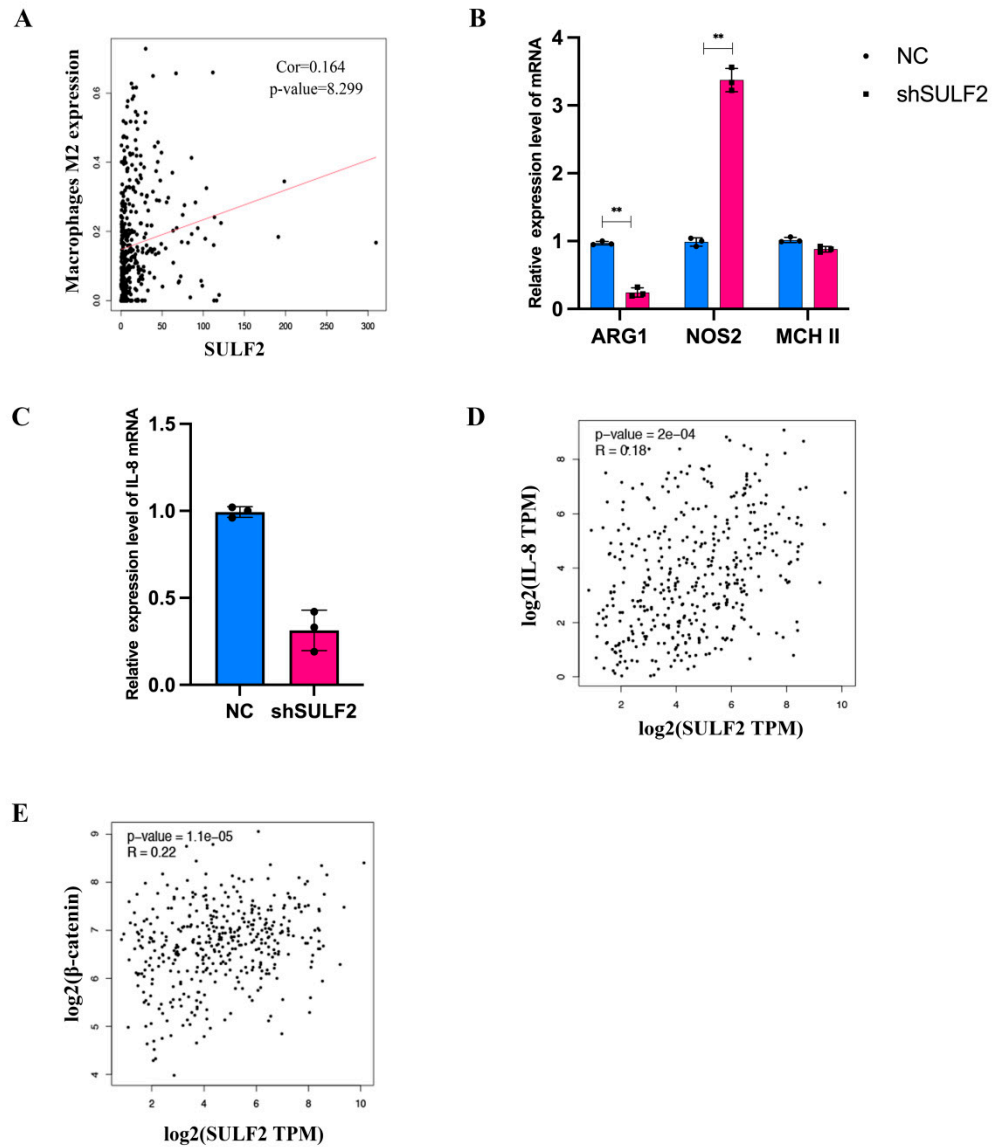

**Figure S2 SULF2 in TCGA database and qPCR validation** (A) SULF2 was positively correlated to M2 macrophages in the TCGA database. (B) Relative mRNA levels of ARG1, NOS2 and MCH II of THP1 in co-culture systems. (C) Relative mRNA levels of IL-8 of MB49 in orthotopic bladder cancer model. (D) The correlation between SULF2 and IL-8 in TCGA database. (E) The correlation between SULF2 and β-catenin TCGA database.
