# Supplementary material for: Sulfatase 2 Affects Polarization of M2 Macrophages through the IL-8/JAK2/STAT3 Pathway in Bladder Cancer
Source: MDPI journal article supplement (doi:10.3390/cancers15010131), 2022-12-26
Supplement: s1 [file s1]

Supplement Table S1: Characteristic of bladder cancer patients in four cohorts.

| Characteristic, n (%) | TCGA<br>(n=403) | STPH<br>(n=90) | GSE32894<br>(n=224) | IMvigor210<br>(n=348) |
|-----------------------|-----------------|----------------|---------------------|-----------------------|
| Age (years)           |                 |                |                     |                       |
| ≥65                   | 254 (63.0)      | 63 (70.0)      | 154 (68.8)          | -                     |
| <65                   | 149 (37.0)      | 27 (30.0)      | 70 (31.3)           | -                     |
| Sex                   |                 |                |                     |                       |
| Male                  | 299 (74.2)      | 73 (81.1)      | 163 (72.8)          | 272                   |
| Female                | 104 (25.8)      | 17 (18.9)      | 61 (27.2)           | 76                    |
| Grade                 |                 |                |                     |                       |
| Low-grade             | 21 (5.2)        | 18 (20.0)      | 129 (57.6)          | -                     |
| High-grade            | 378 (93.8)      | 72 (80.0)      | 93 (41.5)           | -                     |
| Unknown               | 3 (0.7)         | -              | 2 (0.9)             | -                     |
| Subtype               |                 |                |                     |                       |
| NMIBC                 | 3 (0.7)         | 64 (71.1)      | 173 (77.2)          | -                     |
| MIBC                  | 400 (99.3)      | 26 (28.9)      | 51 (22.8)           | -                     |

STPH: Shanghai tenth people's hospital; TCGA: The Cancer Genome Atlas Program.
