# Supplementary material for: Sulfatase 2 Affects Polarization of M2 Macrophages through the IL-8/JAK2/STAT3 Pathway in Bladder Cancer
Source: MDPI journal article supplement (doi:10.3390/cancers15010131), 2022-12-26
Supplement: s1 [file s1]

hSULF2 si-1 sense 5'-CCAUGGAGACGAUUUACAATT-3'  
hSULF2 si-1 antisense 5'-UUGUAAAUCGUCUCCAUGGAG-3'  
hSULF2 si-2 sense 5'-GCUACACAAGAGAGACAAUTT-3'  
hSULF2 si-2 antisense 5'-AUUGUCUCUCUUGUGUAGCAG-3'  
hSULF2 si-3 sense 5'-GGACCAAGAUGACAAGGAUTT-3'  
hSULF2 si-3 antisense 5'-AUCCUUGUCAUCUUGGUCCTC-3'

#### Primer

SULF2 Forward 5'-AAGGTTGATTCTTTCAGGGAGC-3'  
Reverse 5'-AGTGGATCTGAGTTAGGTCATGG-3'  
GAPDH Forward 5'-GCCAAGGTCATCCATGACAACCTTTGG-3'  
Reverse 5'-GCCTGCTTCACCACCTICITGATGIC-3'  
ARG1 Forward:5' -TGATGTTGACGGACTGGACC-3'  
Reverse 5' -ATCTAATCCTGAGAGTAGCCCTGT-3'  
NOS2 Forward:5' -TCCGAGGCAAACAGCACATTC-3'  
Reverse 5' -GGGTTGGGGGTGTGGTGATGT-3'  
MCH II Forward:5' -ACCTACCCTTCCTCCCTTCTGC -3'  
Reverse 5' -ACAACCCCAGGGCACAGACC-3'

mouse-IL-8(CXCL15) Forward:5' -GGCCCAATTACTAACAGGT-3'  
Reverse 5' -ATATAGAGGCTTTTCATGCTCA-3'  
mouse-GAPDH Forward:5' -TCAACAGCAACTCCCCTCTT-3'  
Reverse 5' -CCAGGGTTTCTTACTCCTTGG-3'
