# Supplementary material for: Sulfatase 2 Affects Polarization of M2 Macrophages through the IL-8/JAK2/STAT3 Pathway in Bladder Cancer
Source: MDPI journal article supplement (doi:10.3390/cancers15010131), 2022-12-26
Supplement: s1 [file s1]

Supplementary Figure S3

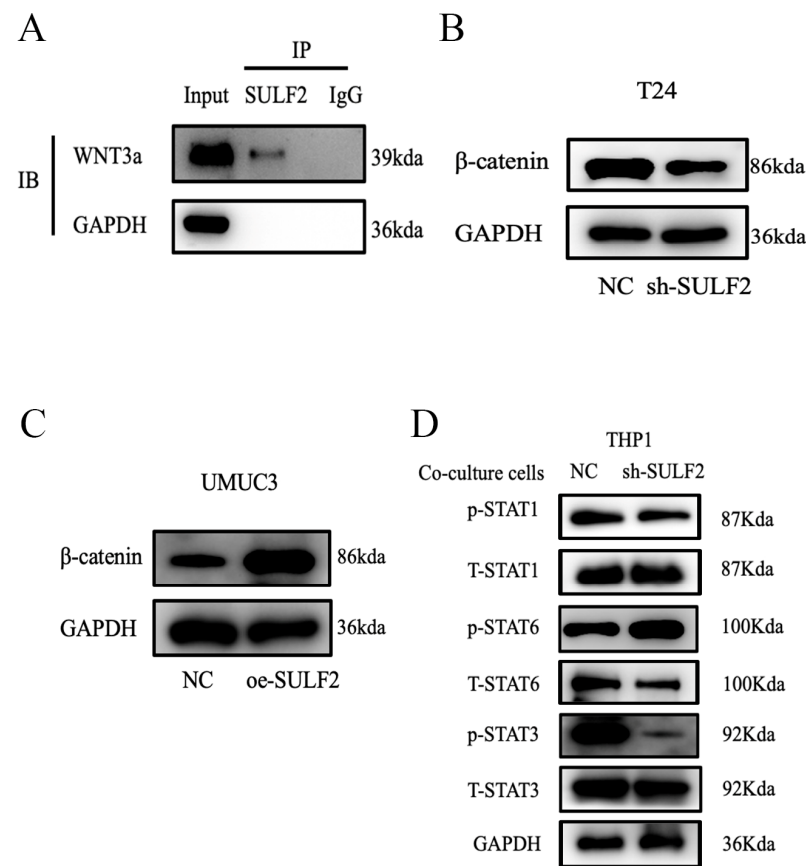

**Figure S3** SULF2 regulates the expression of  $\beta$ -catenin (A) IP assay of SULF2 and WNT3A,(B-C) The knockdown and overexpression efficiencies of  $\beta$ -catenin were verified by western blot.(D) The expression levels of STAT family were detected by western blot after knockdown of SULF2
