# Supplementary material for: Sulfatase 2 Affects Polarization of M2 Macrophages through the IL-8/JAK2/STAT3 Pathway in Bladder Cancer
Source: Cancers (Basel). 2022 Dec 26;15(1):131. doi: 10.3390/cancers15010131 (PMC9818157; doi:10.3390/cancers15010131)
Supplement: Supplementary file 1 [file cancers-15-00131-s001.zip › Supplementary Table S2.xlsx]

## Sheet: Sheet1
Antibodies	Product number	Company	County
GAPDH	60004-1-Ig	ProteinTech	china
SULF2	ab232835	abcam	US
vimentin	ab92547	abcam	US
E-cadherin	ab76055	abcam	US
N-cadherin	ab245177	abcam	US
JAK2	ab108596	abcam	US
p-JAK2	ab32601	abcam	US
Wnt 3a	ab234099	abcam	US
CD206	24595	Cell Signaling Technology	US
CD163	ab182422	abcam	US
β-catenin	ab32572	abcam	US
STAT1	ab234400	abcam	US
p-STAT1	ab109461	abcam	US
STAT3	ab68153	abcam	US
p-STAT3	ab267373	abcam	US
STAT6	ab32108	abcam	US
p-STAT6	ab263947	abcam	US
